# Supplementary material for: Multiple Spike Time Patterns Occur at Bifurcation Points of Membrane Potential Dynamics
Source: PubMed Central journal article supplement (PMC3475656; doi:10.1371/journal.pcbi.1002615), 2012-10-18

**A**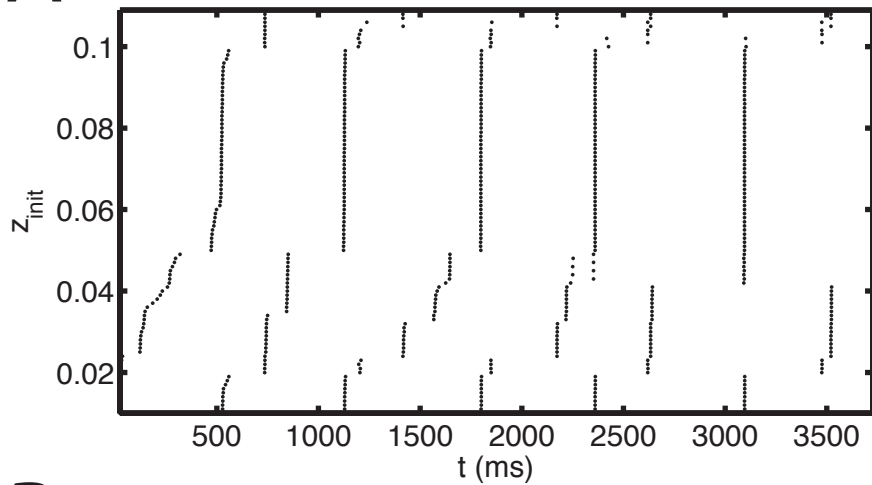**B**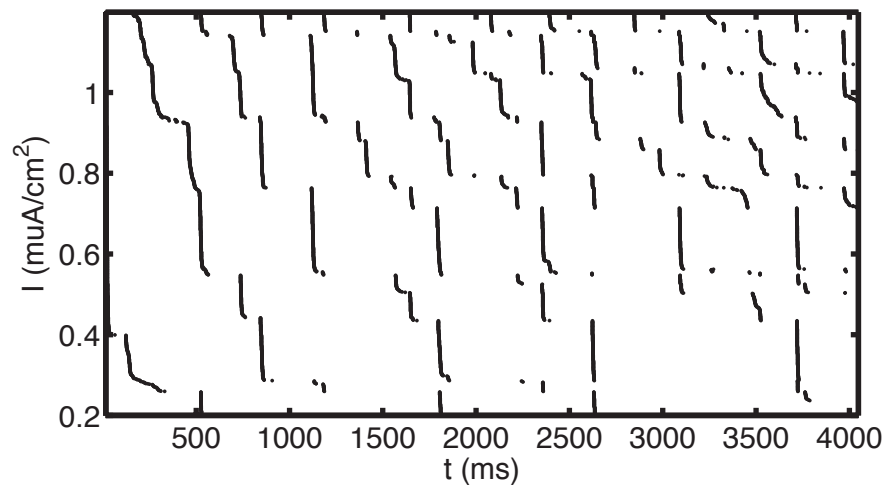**C**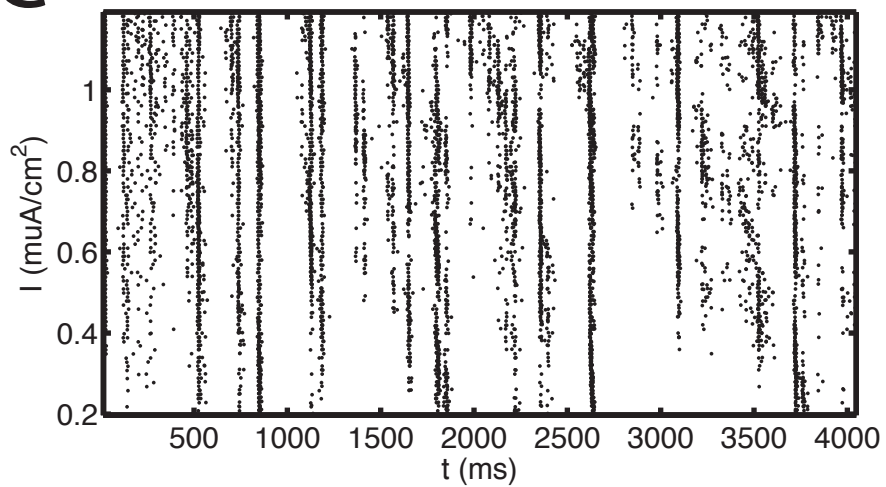

Supplement: pcbi.1002615.s003.pdf [file pcbi.1002615.s003.pdf]
